# Supplementary material for: Design and Experiment of a Hand Movement Device Driven by Shape Memory Alloy Wires
Source: Hindawi journal article supplement (doi:10.1155/2021/6611581), 2021-03-30
Supplement: f1 [file 6611581.f1.docx]

# Hand movement device driven by Shape memory alloy (Supplementary Materials)

## Video S1: Video of fingers flexing

**(Please double click the icon to play)**
